# Supplementary material for: Non-Linear Optical Flow Cytometry Using a Scanned, Bessel Beam Light-Sheet
Source: PubMed Central journal article supplement (PMC4448227; doi:10.1038/srep10751), 2015-05-29
Supplement: srep10751-s1.pdf [file srep10751-s1.pdf]

## Non-Linear Optical Flow Cytometry Using a Scanned, Bessel Beam Light-Sheet

Supplementary Information

Bradley B. Collier<sup>1</sup>, Samir Awasthi<sup>1,2</sup>, Deborah K. Lieu<sup>3</sup>, James W. Chan<sup>1,4\*</sup>

<sup>1</sup>Center for Biophotonics, University of California, Davis

<sup>2</sup>Department of Biomedical Engineering, University of California, Davis

<sup>3</sup>Department of Internal Medicine, University of California, Davis

<sup>4</sup>Department of Pathology and Laboratory Medicine, University of California, Davis

\*jwjchan@ucdavis.edu

**Table S1.** List of the parts used for Bessel beam (BB), tightly focused Gaussian (TG), and relaxed Gaussian (RG) systems. It is also important to note other optical elements that were utilized but are not depicted above. Specifically, several mirrors were utilized for beam alignment and a variable attenuator (consisting of a 1/2 wave plate and a polarizer) was used to control the laser beam power.

| Label          | Company                | Model/Part #            | Description                                           | Function                       | System |
|----------------|------------------------|-------------------------|-------------------------------------------------------|--------------------------------|--------|
| Laser          | Laser Quantum          | Taccor C                | 1 GHz rep. rate, 80 fs pulse width, 920 nm wavelength | Sample excitation              | All    |
| F <sub>1</sub> | Semrock                | RazorEdge LP647         | 647 nm long pass filter                               | Laser clean-up                 | All    |
| L <sub>1</sub> | Thorlabs               | AC127-025-B             | Achromatic lens                                       | 3x Keplarian telescope         | BB     |
| L <sub>2</sub> | Thorlabs               | AC254-075-B             | Achromatic lens                                       | 3x Keplarian telescope         | BB     |
| L <sub>3</sub> | Thorlabs               | AC254-075-B             | Achromatic lens                                       | Annulus focusing               | BB     |
| L <sub>4</sub> | Thorlabs               | AX2505-B                | Axicon                                                | Annulus formation              | BB     |
| M <sub>1</sub> | Cambridge Technologies | 8310K                   | Scanning mirror                                       | Scan beam across sample        | BB, TG |
| L <sub>5</sub> | Thorlabs               | AC254-100-B             | Achromatic lens                                       | 2x Keplarian telescope         | BB, TG |
| L <sub>6</sub> | Thorlabs               | AC254-200-B             | Achromatic lens                                       | 2x Keplarian telescope         | BB, TG |
| M <sub>2</sub> | Thorlabs               | PF10-03-P01             | Silver mirror                                         | Align beam onto objective      | All    |
| O <sub>1</sub> | Olympus                | UPlanApo/IR 60X/1.20W   | 60x water objective                                   | Beam focusing onto sample      | BB, TG |
| MC             | Labsmith               | 02-0768-0106-05         | t-shaped microfluidic channel                         | Hydrodynamically focus sample  | All    |
| O <sub>2</sub> | Nikon                  | CFPlan 50X/0.55NA, ELWD | 50x, extra long working distance objective            | Signal collection              | All    |
| F <sub>2</sub> | Chroma                 | HQ610SP                 | 610 nm short pass filter                              | Eliminate any excitation light | All    |
| Detector       | Hamamatsu              | H7421-20                | Photon counting PMT                                   | Measure fluorescence           | All    |
| --             | Thorlabs               | LA1461                  | Plano-convex lens, f=250mm                            | Relaxed Gaussian beam          | RG     |

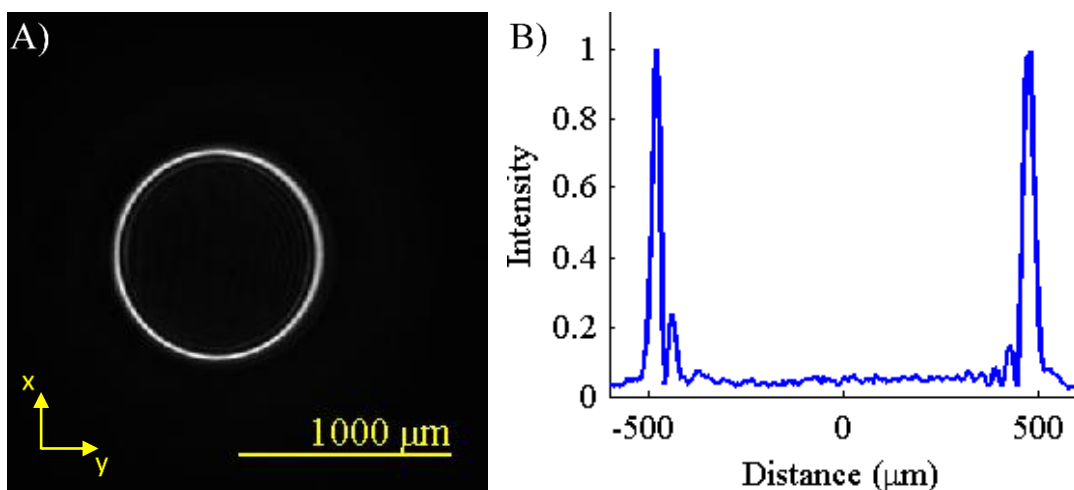

**Figure S1.** (A) Normalized image of the annulus obtained by reducing the laser power and capturing the annulus directly on a CCD. (B) Profile through the center of the annulus. The outer and inner diameters are 981.4 μm and 926.2 μm, respectively. The peak to peak width is 954.6 μm.

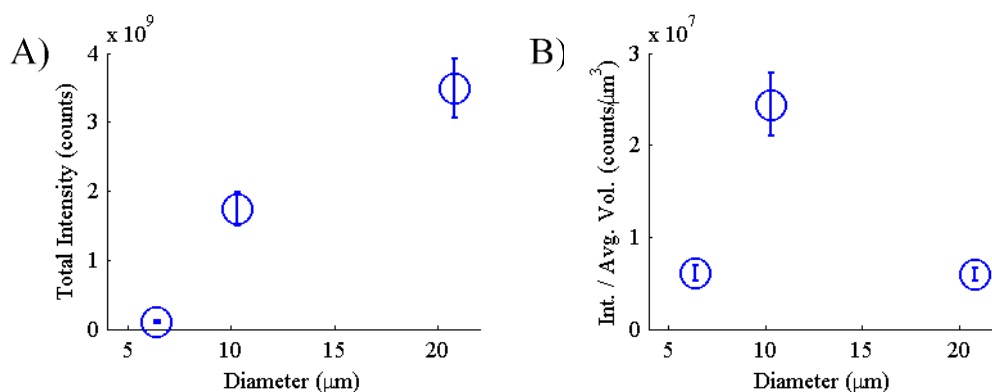

**Figure S2.** (A) The average total intensity for 6, 10, and 20 μm particles ( $n=25$ ) displayed is representative of the total dye present in each particle. This data was obtained by summing z-stack images taken using a confocal microscope and one-photon fluorescence. (B) The relative dye concentration was also investigated by dividing the total intensity by the average particle volume. Although the total amount of dye is higher in the 20 μm particles, the 10 μm particles have a dye concentration that is approximately 4 times larger. Error bars represent standard deviation in both figures.

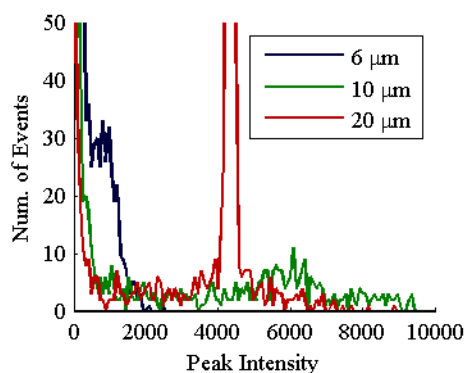

**Figure S3.** A zoom in of the data shown in **Error! Reference source not found.B** for excitation using a static, tightly focused Gaussian beam. Closer inspection shows the measured peak intensity for several 10  $\mu\text{m}$  particles was larger than the peak intensities measured for 20  $\mu\text{m}$  particles.

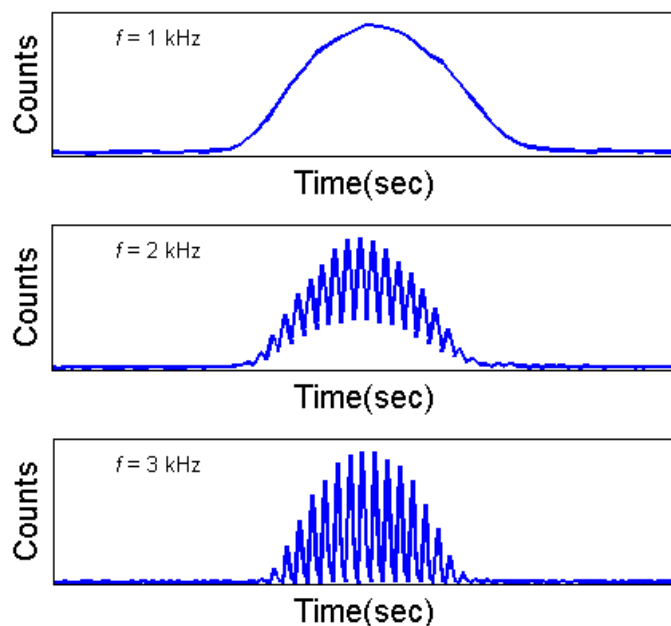

**Figure S4.** These graphs show the effect of increasing the sampling rate used to monitor the PMT. The top graph shows that when the sampling rate is set to 1 kHz (as was done for results in the manuscript), a smooth 2PF event can be obtained. However, as the sampling rate is increased, oscillations are seen in the 2PF events due to scanning of the beam off and on the particle. To obtain data that is more easily manageable a 1 kHz sampling rate was utilized which corresponds to 1 sample per period of the beam scan.

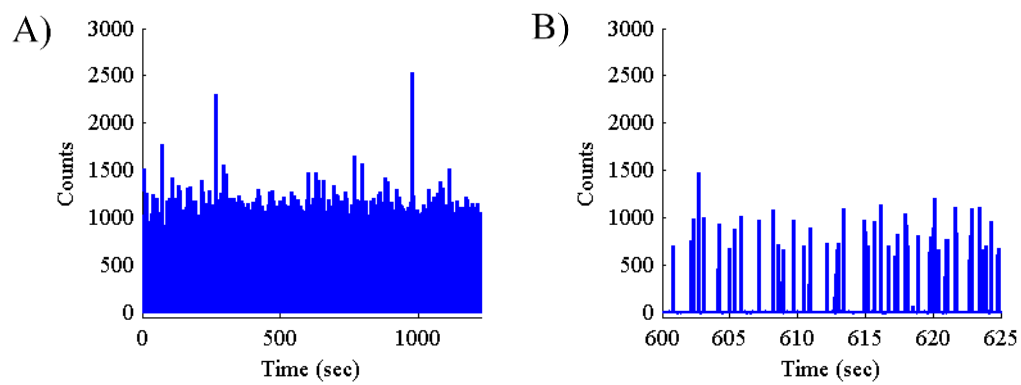

**Figure S5.** (A) Raw data of the 10  $\mu\text{m}$  particles excited with a scanned Bessel beam. (B) A zoom in on the same set of data.
